# Supplementary material for: Alveolar type II epithelial cell FASN maintains lipid homeostasis in experimental COPD
Source: JCI journal article supplement (doi:10.1172/jci.insight.163403), 2023-08-21
Supplement: sd2 [file 2]

Figure 2E

FASN →  
(270kDa)

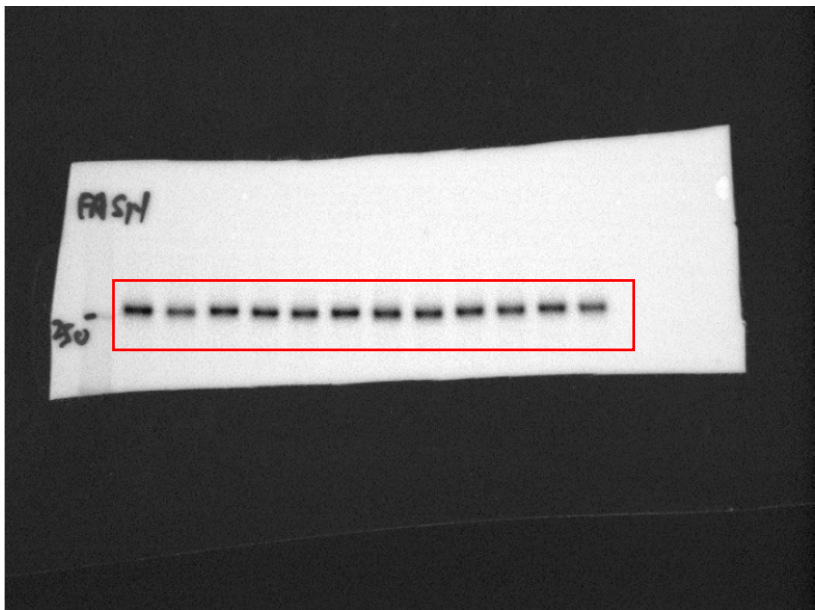

β-actin →  
(42kDa)

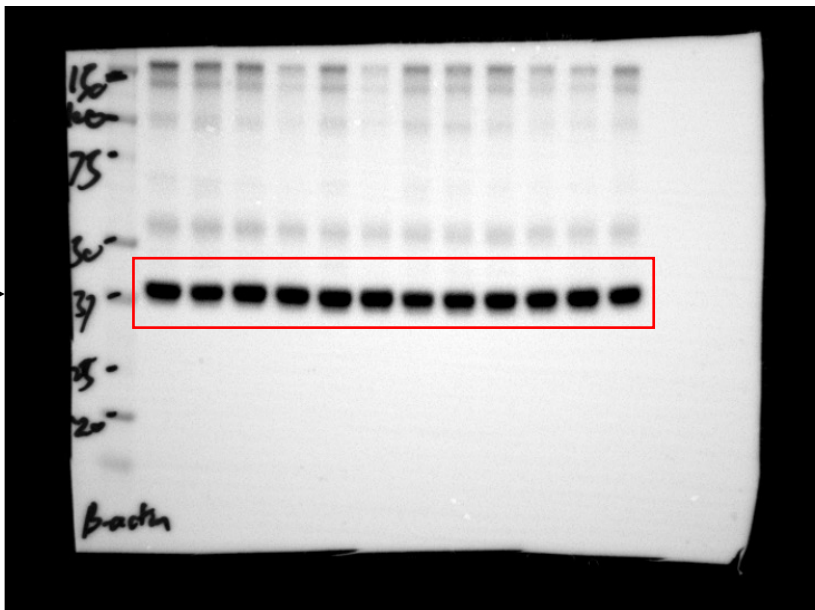

FASN and β-actin were from the same membrane.

ACC →  
(280kDa)

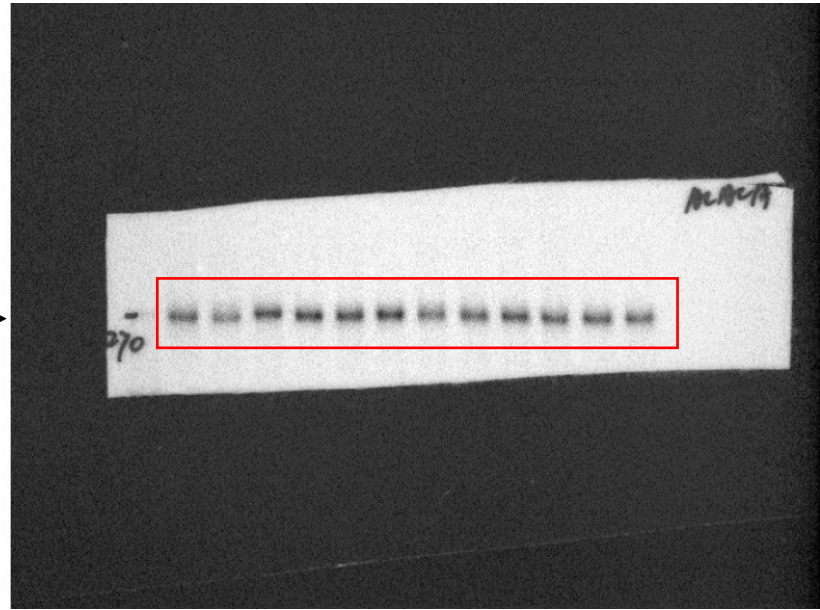

ACLY →  
(110kDa)

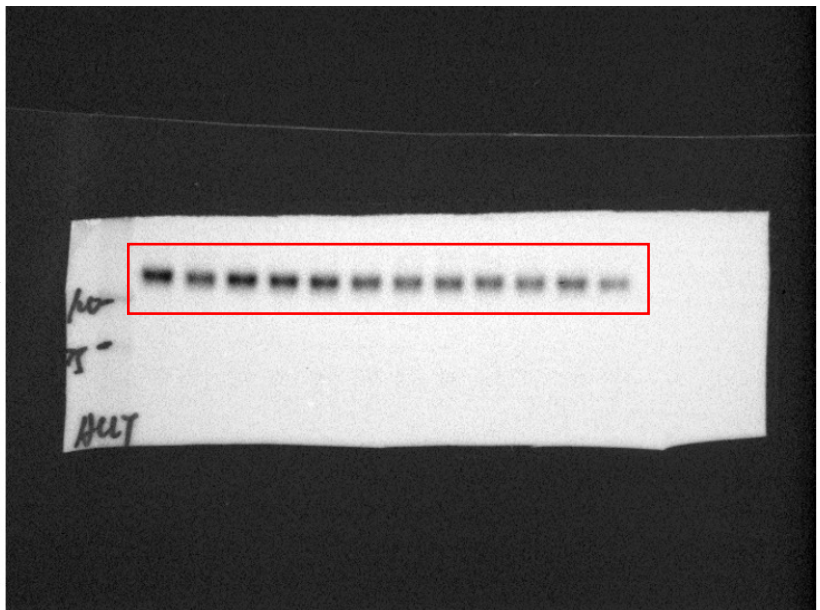

ACC and ACLY were from the same membrane.

Figure 2G

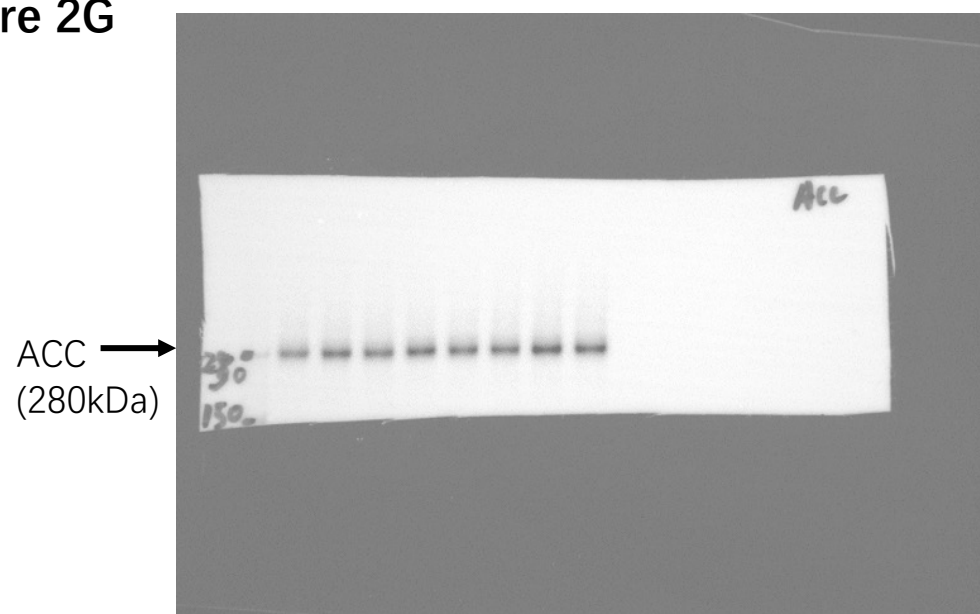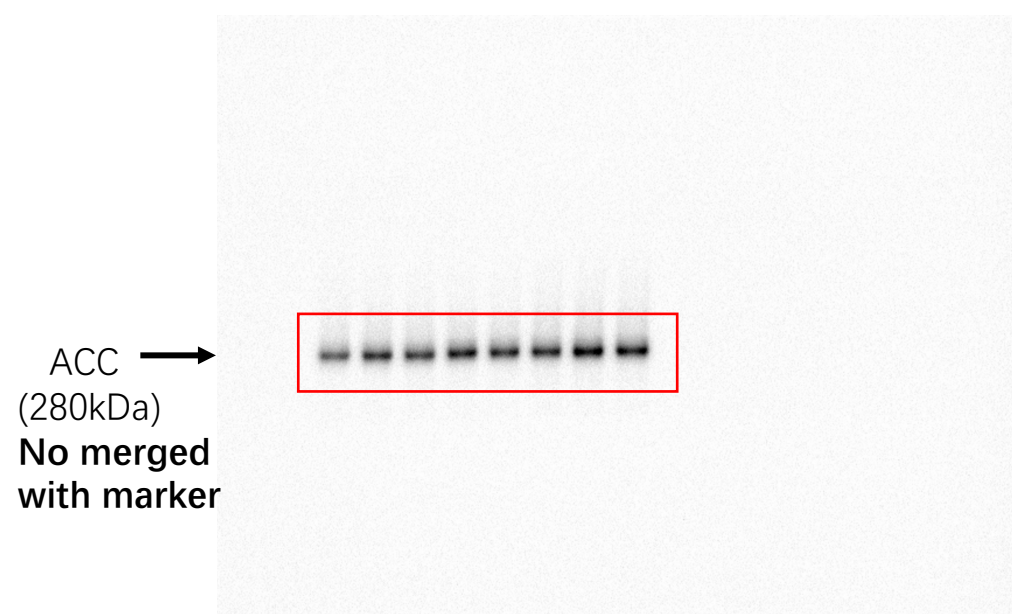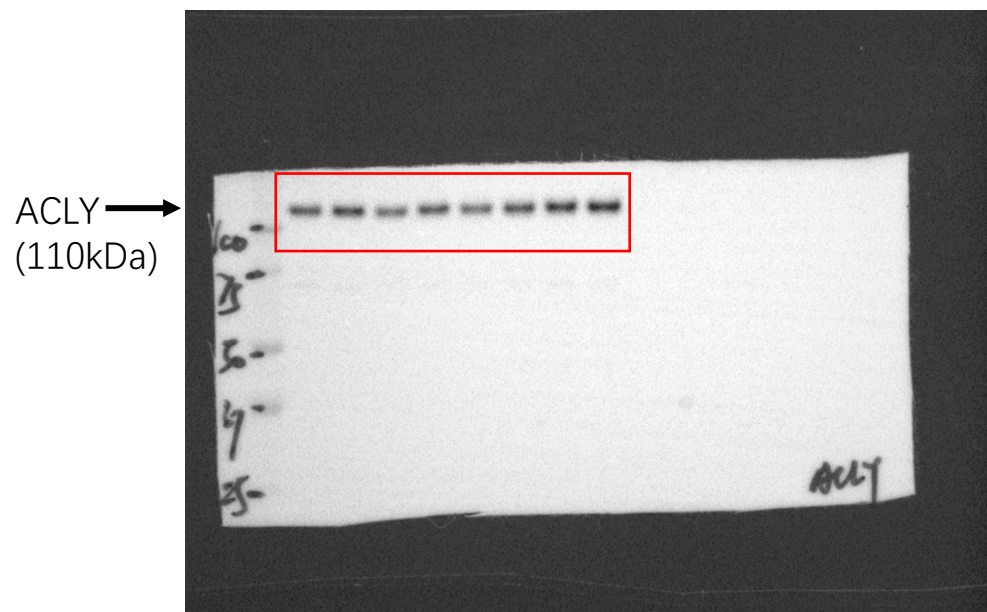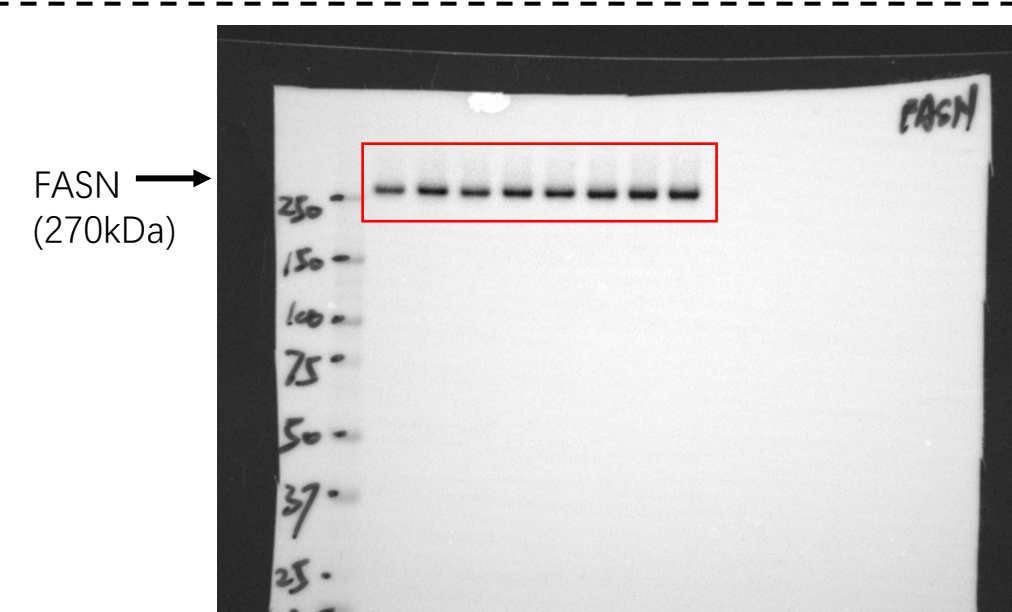

ACC and ACLY were from the same membrane.

FASN was from another membrane.



Figure 2G

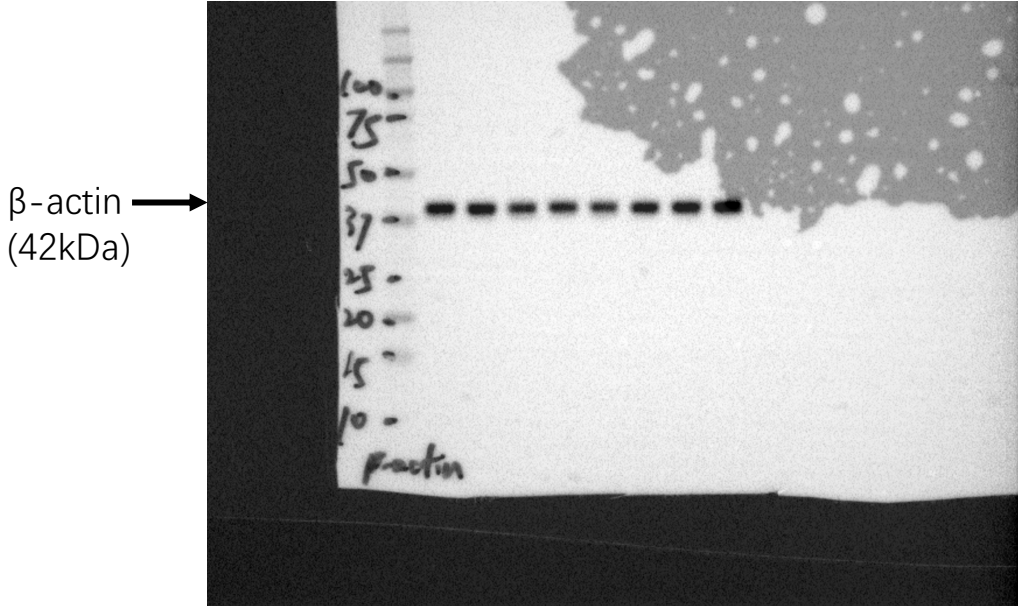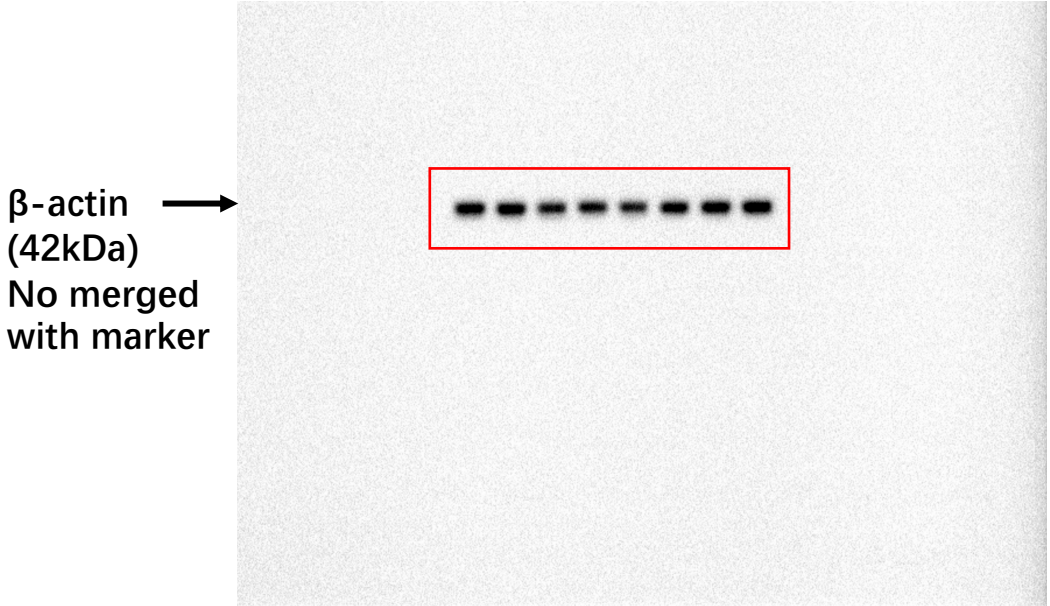

$\beta$ -actin was from another membrane.

Figure 3C

FASN  
(270kDa)

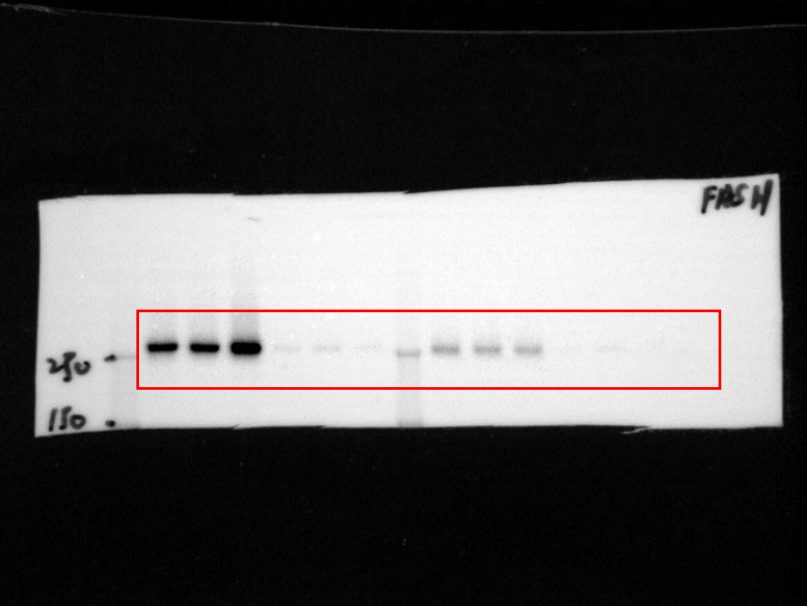

ACLY  
(110kDa)

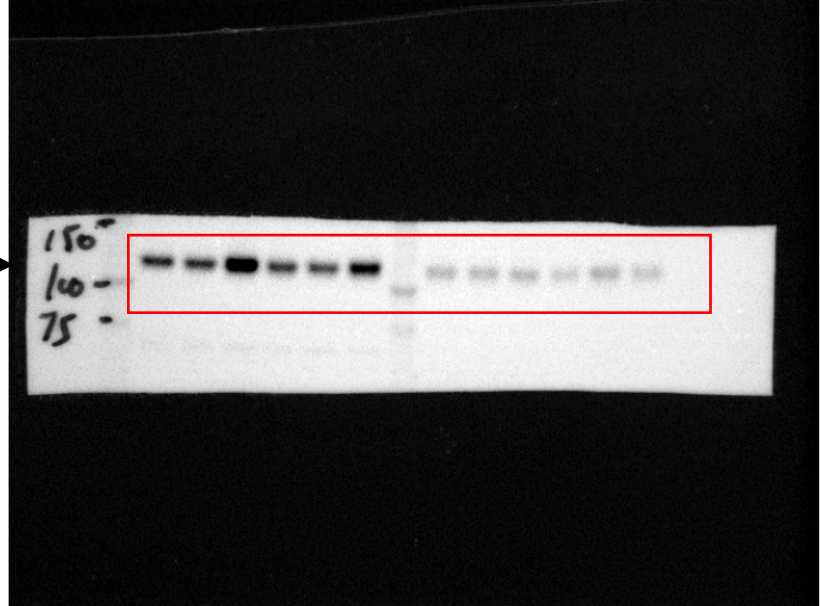

$\beta$ -actin  
(42kDa)

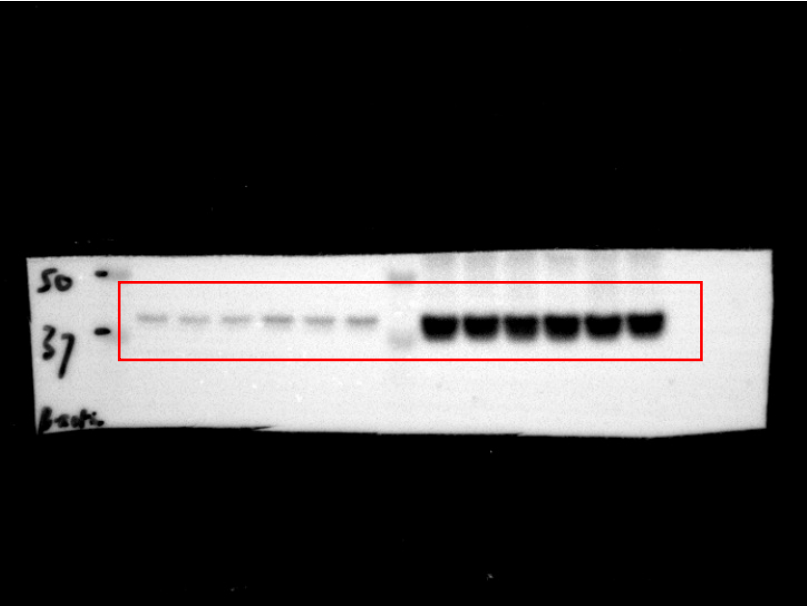

ACC  
(280kDa)

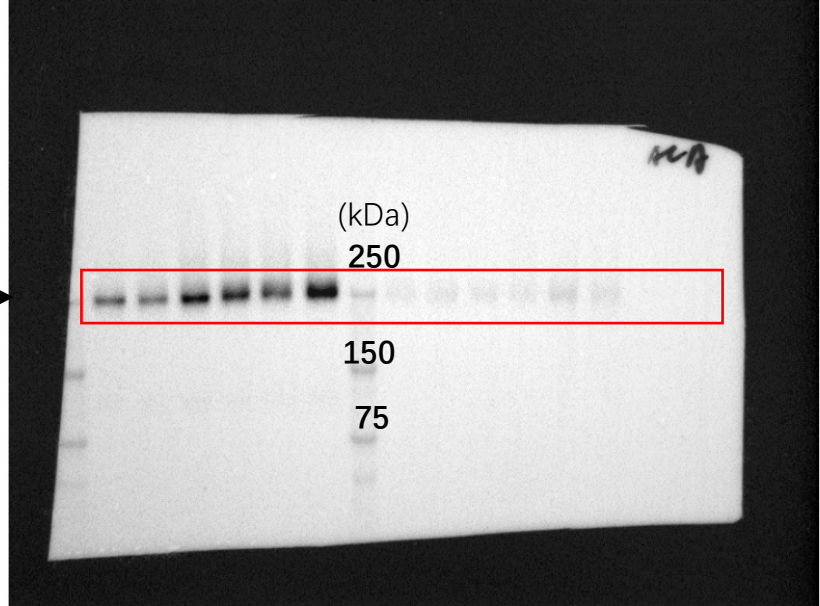

FASN, ACLY and  $\beta$ -actin were from the same membrane.

ACC was from another membrane.



Figure 7C

GPX4

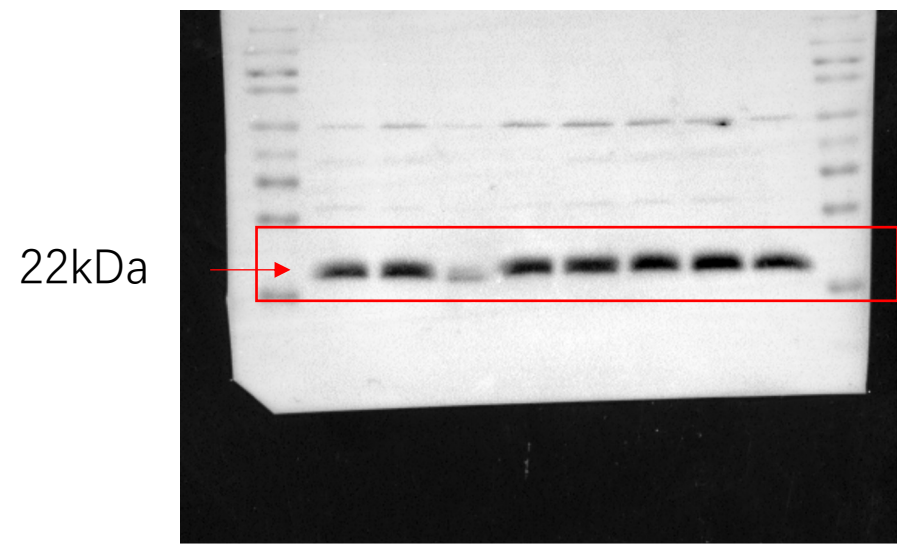

Actin

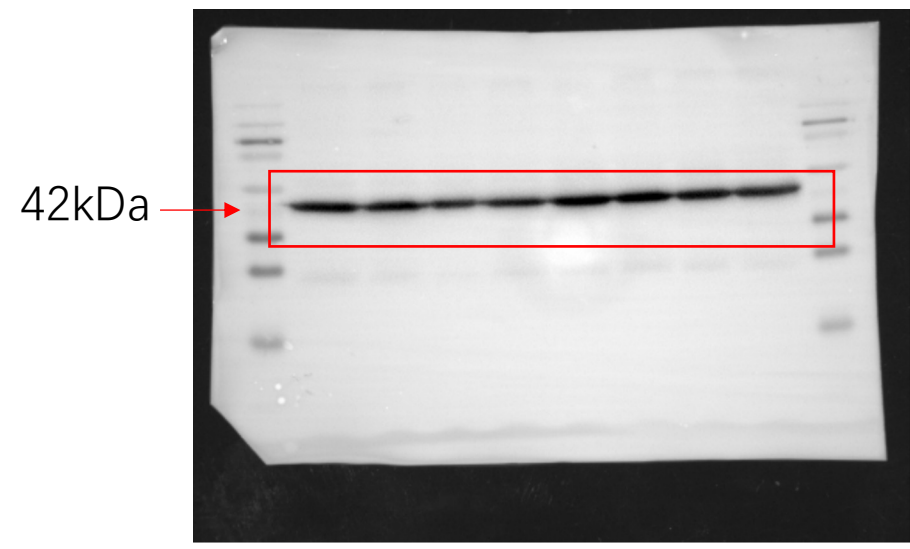

GPX4 and actin run on same gel/membrane after stripping

SLC7A11

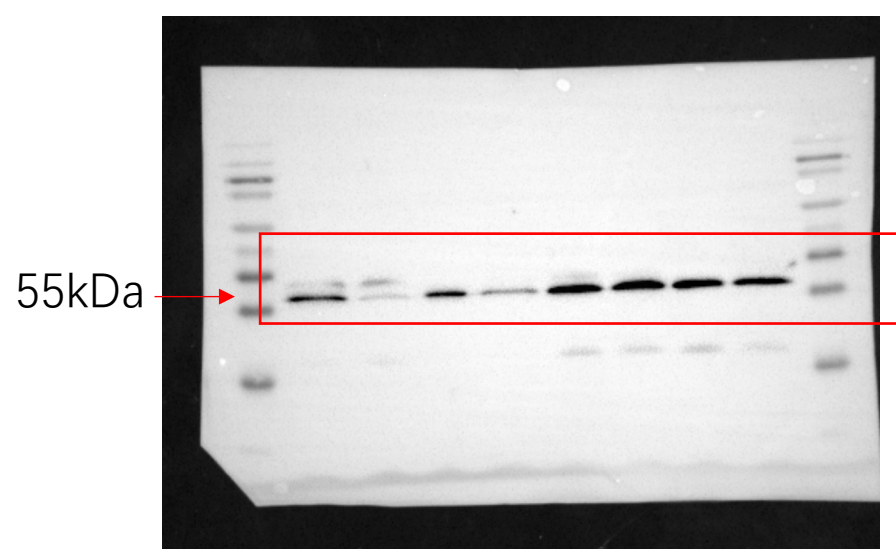

Actin

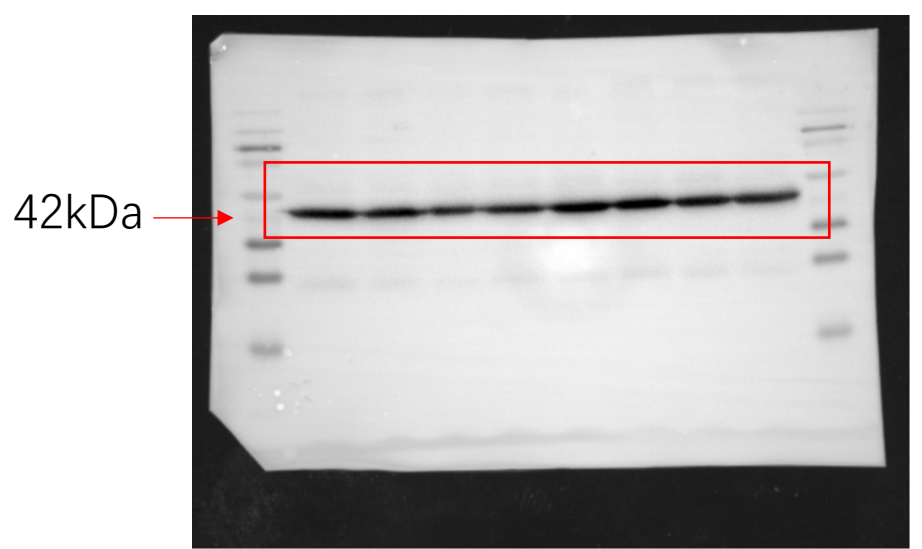

SLC7A11 and actin run on same gel/membrane after stripping

## **Supplemental Figures**



SFig2 E

FASN(270kDa) →  
Marker (250kDa) →  
Marker (150kDa) →  
Marker (100kDa) →

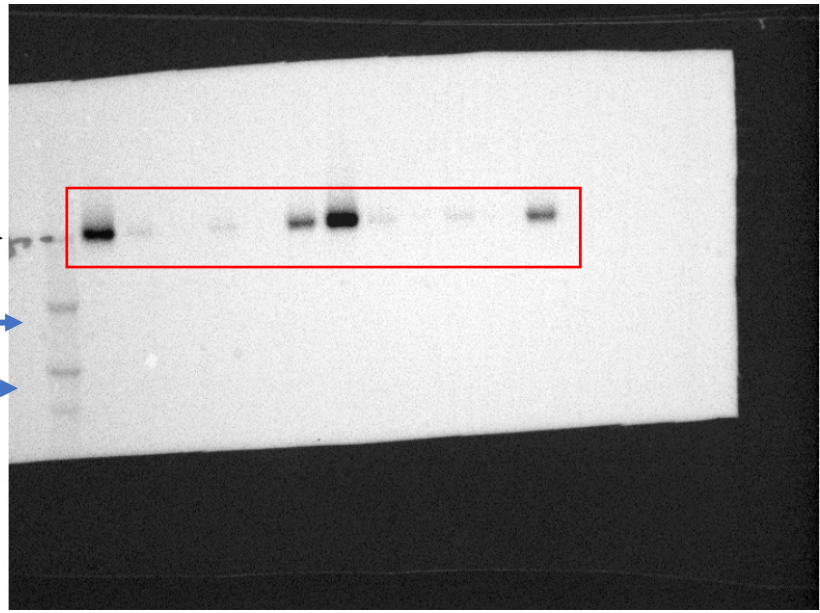

β-actin (42kDa) →

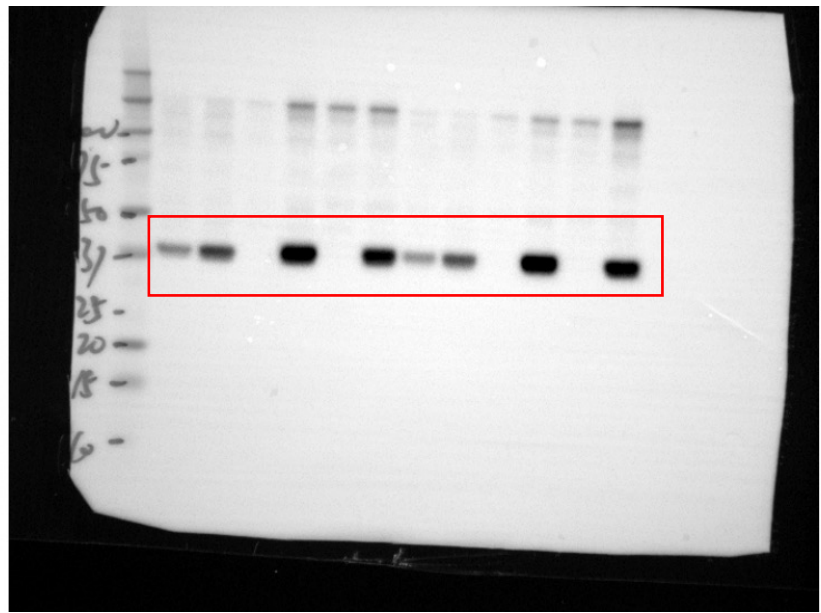

GAPDH (36kDa) →

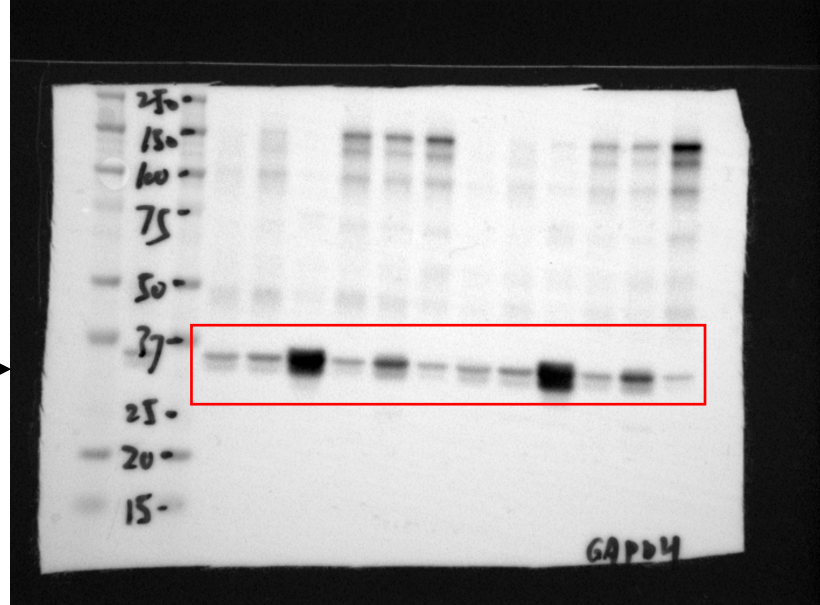

FASN, ACLY and β-actin were from different membrane. For FASN 15μg/8ul sample was added to each lane, for β-actin and GAPDH 11.25 μg/6ul sample was added to each lane.

SFig2 F

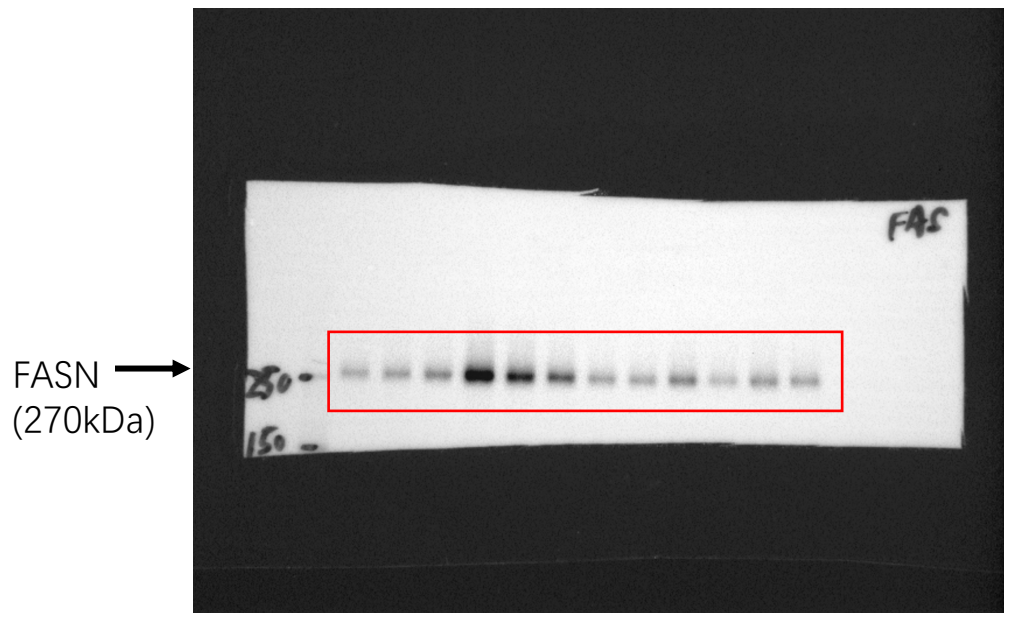

ACLY →  
(110kDa)

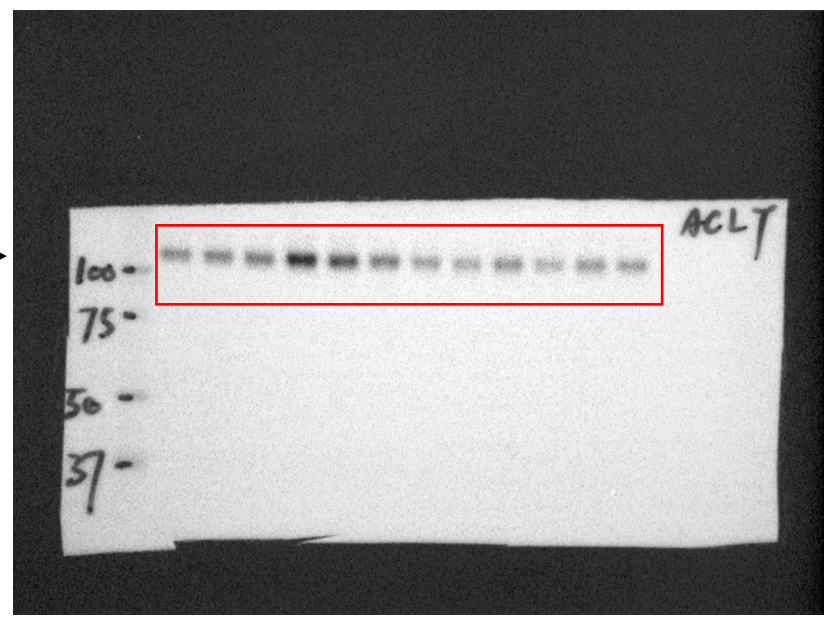

FASN and ACLY were from the same membrane.



SFig2 F

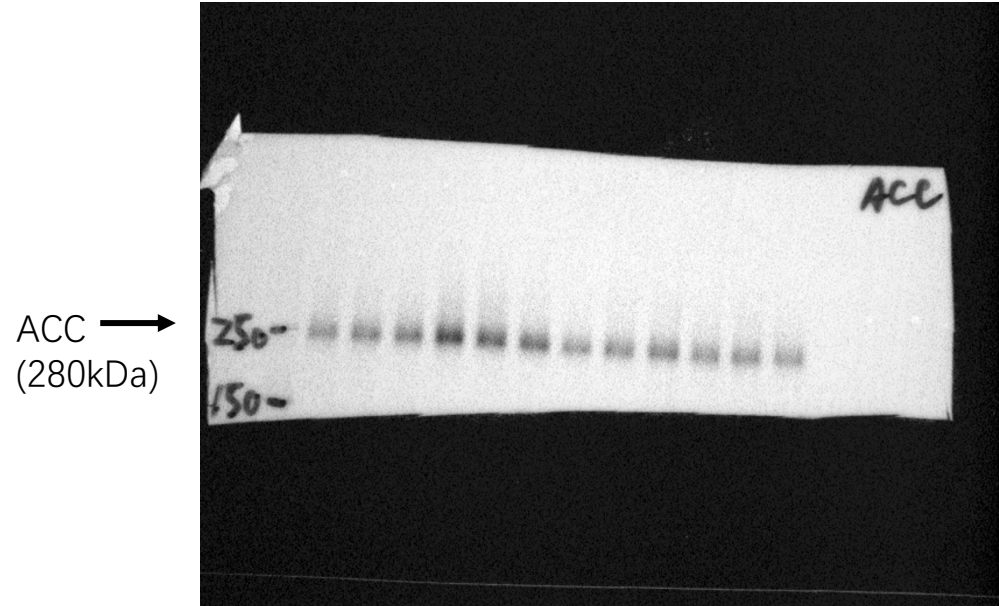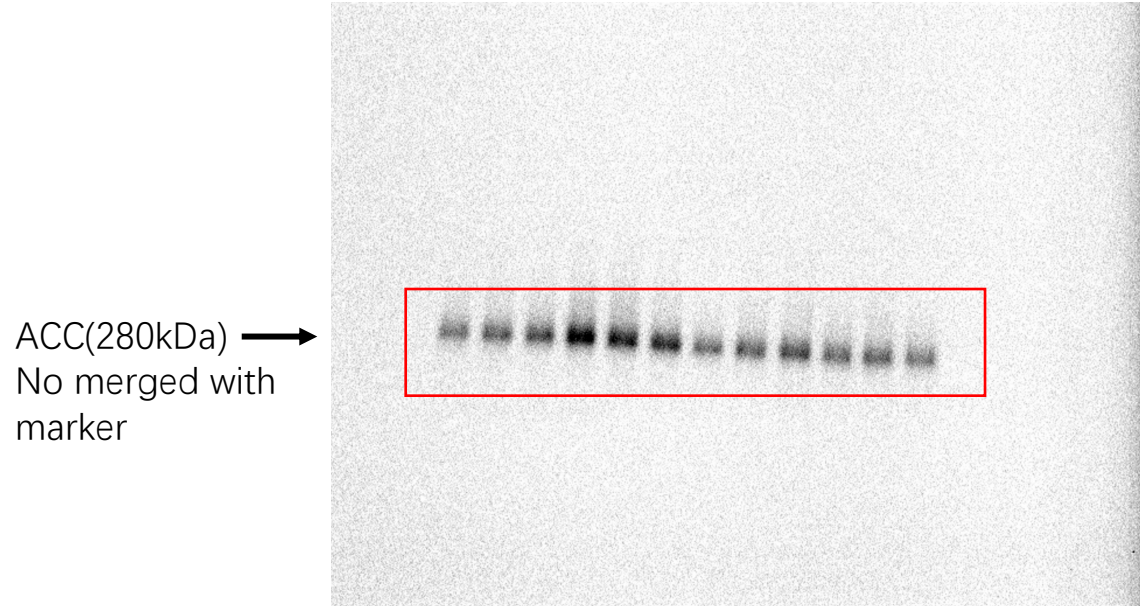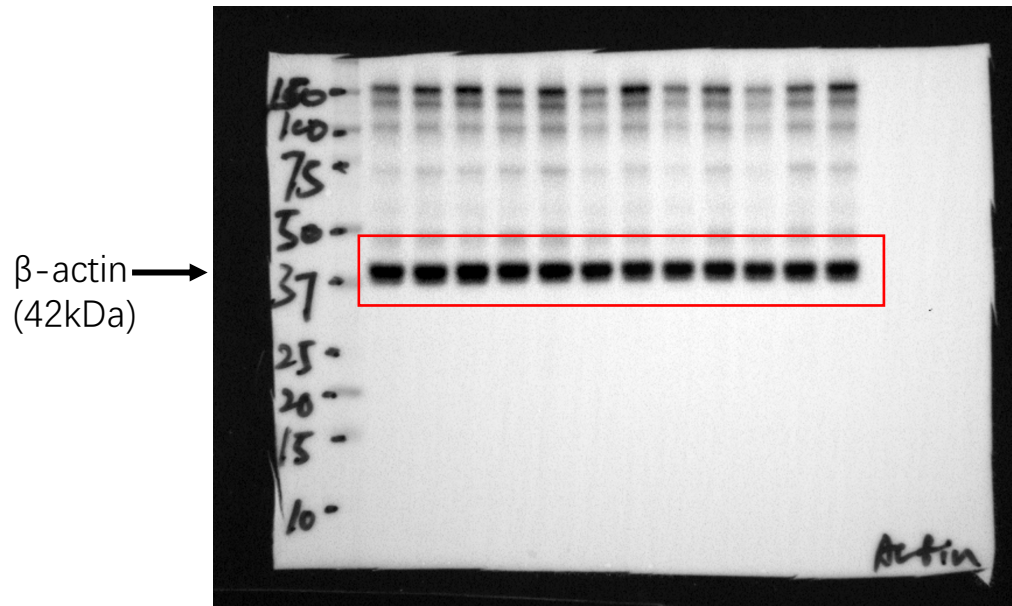

ACC and β-actin were from the same membrane.

SFigure 3A primary AEC2

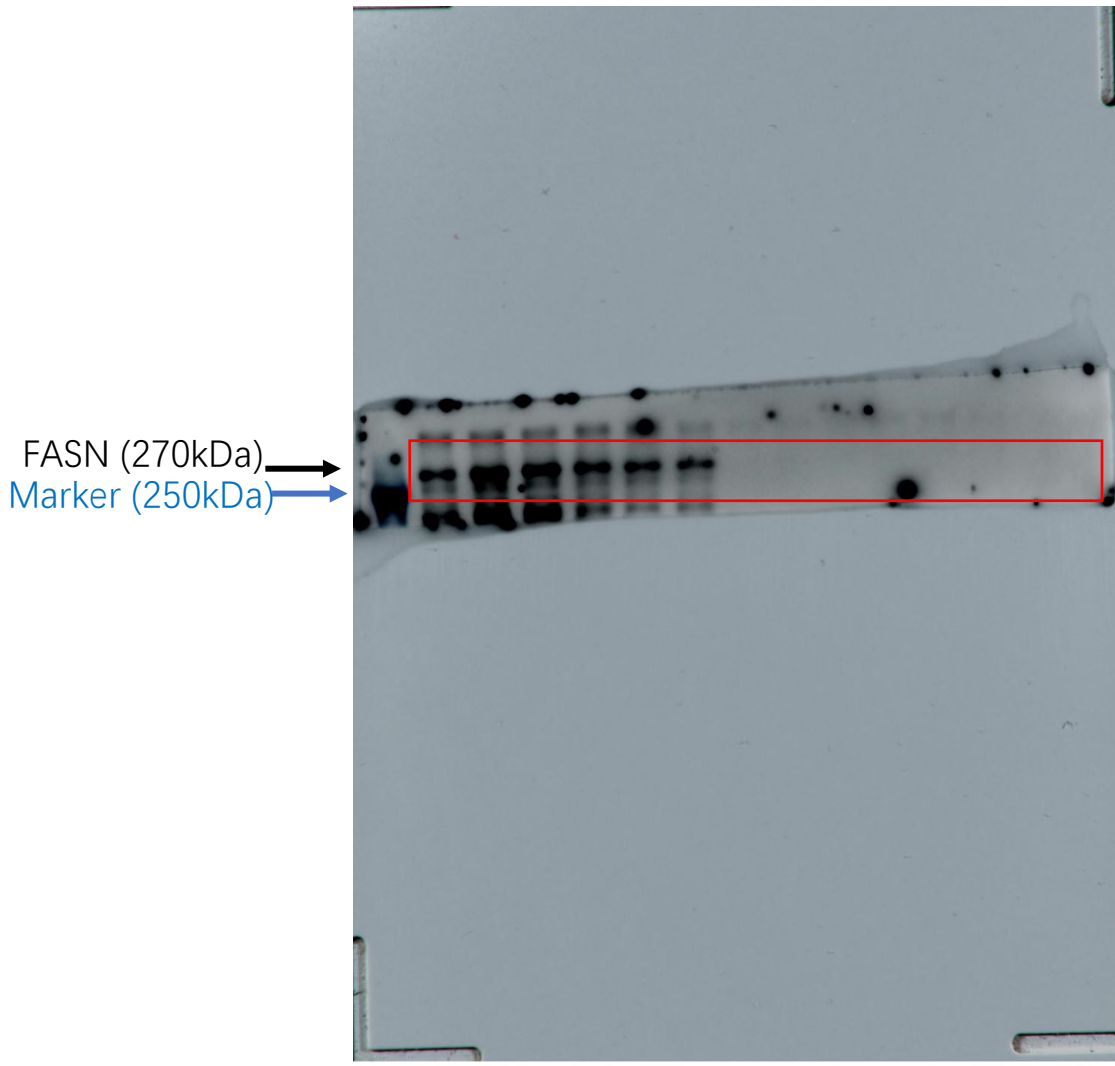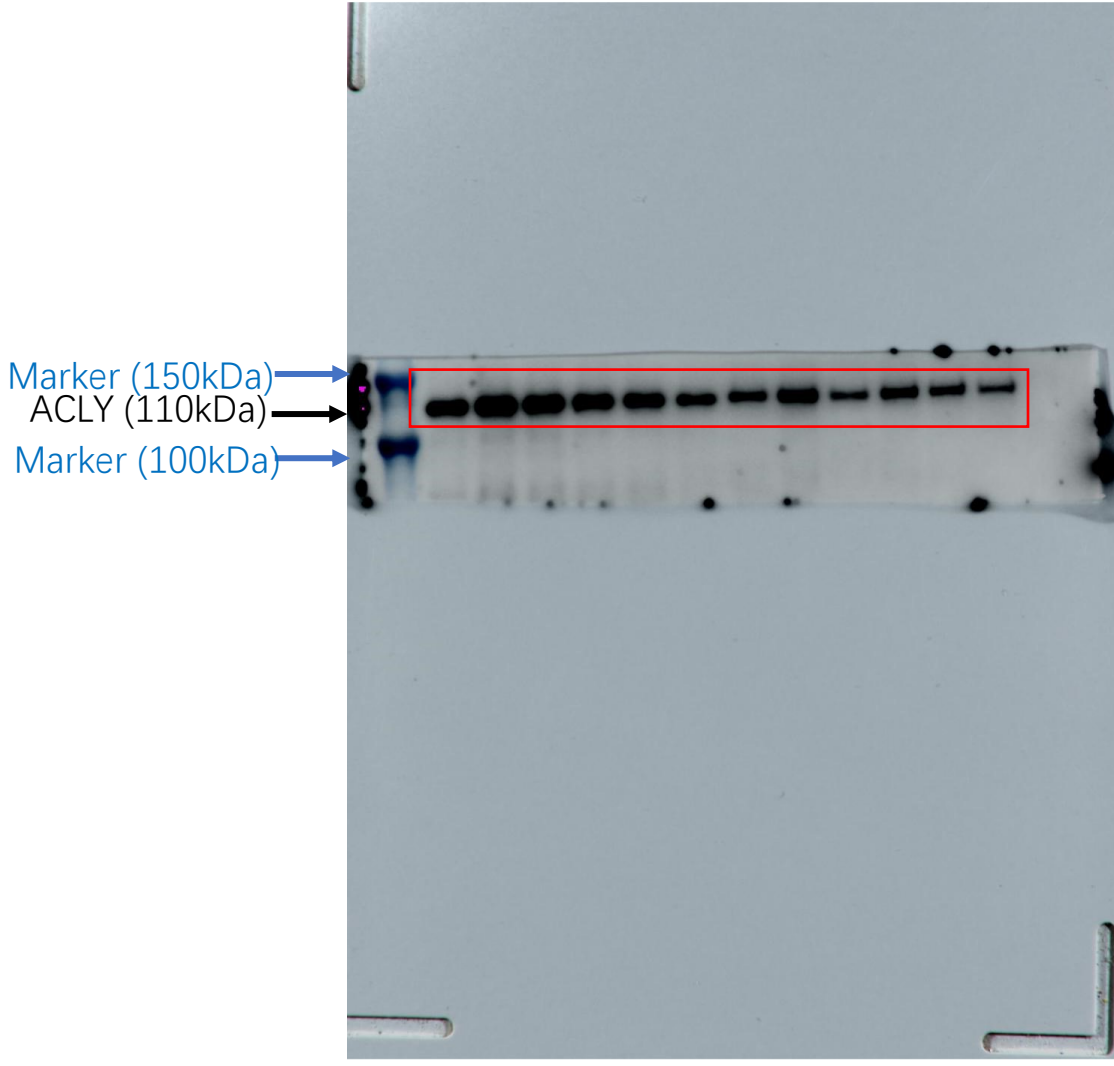

FASN and ACLY were from the same membrane.



SFigure 3A primary AEC2

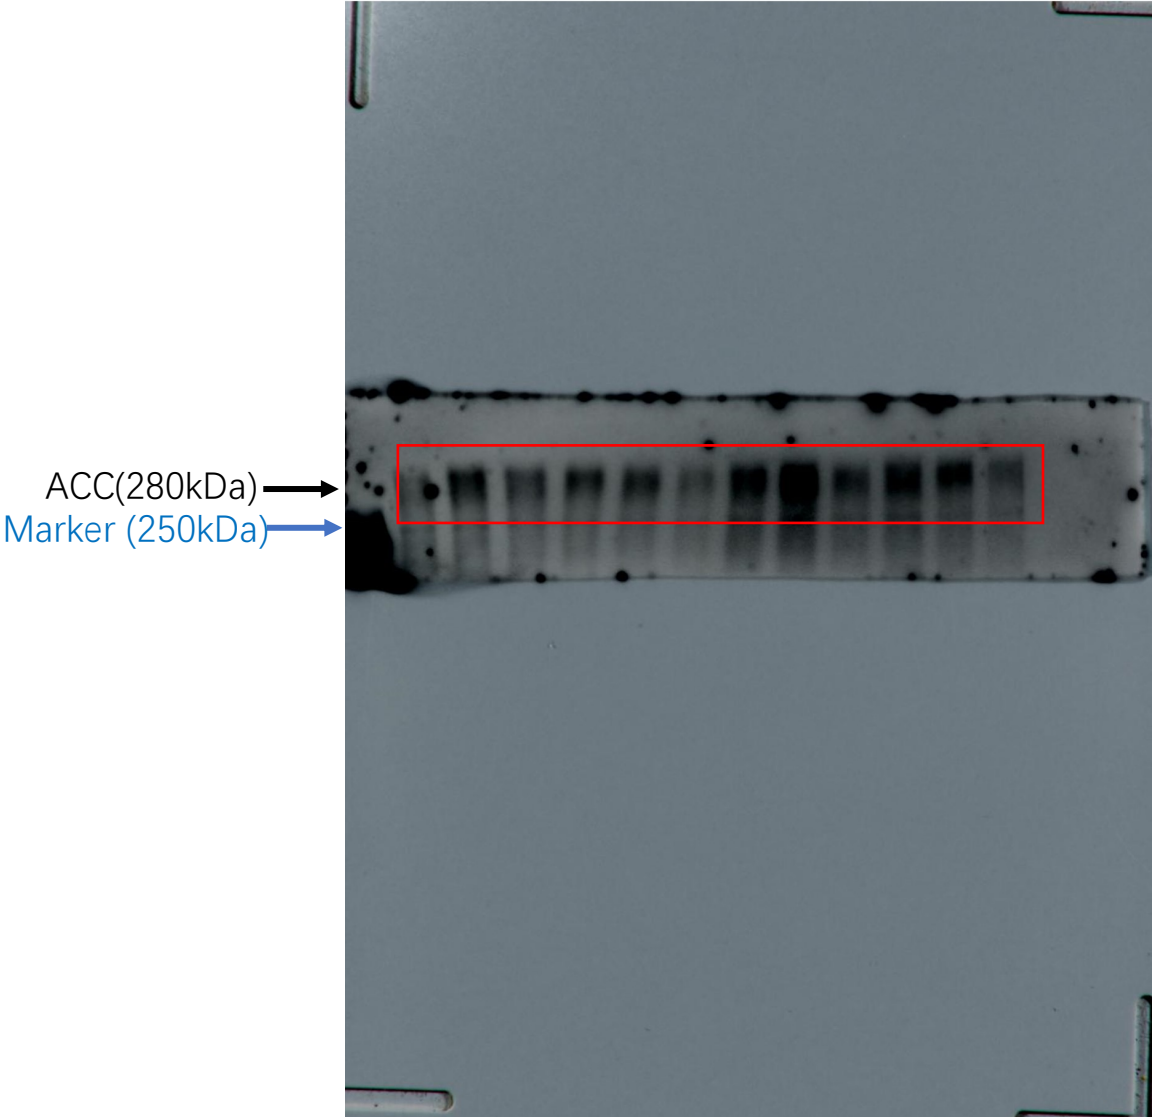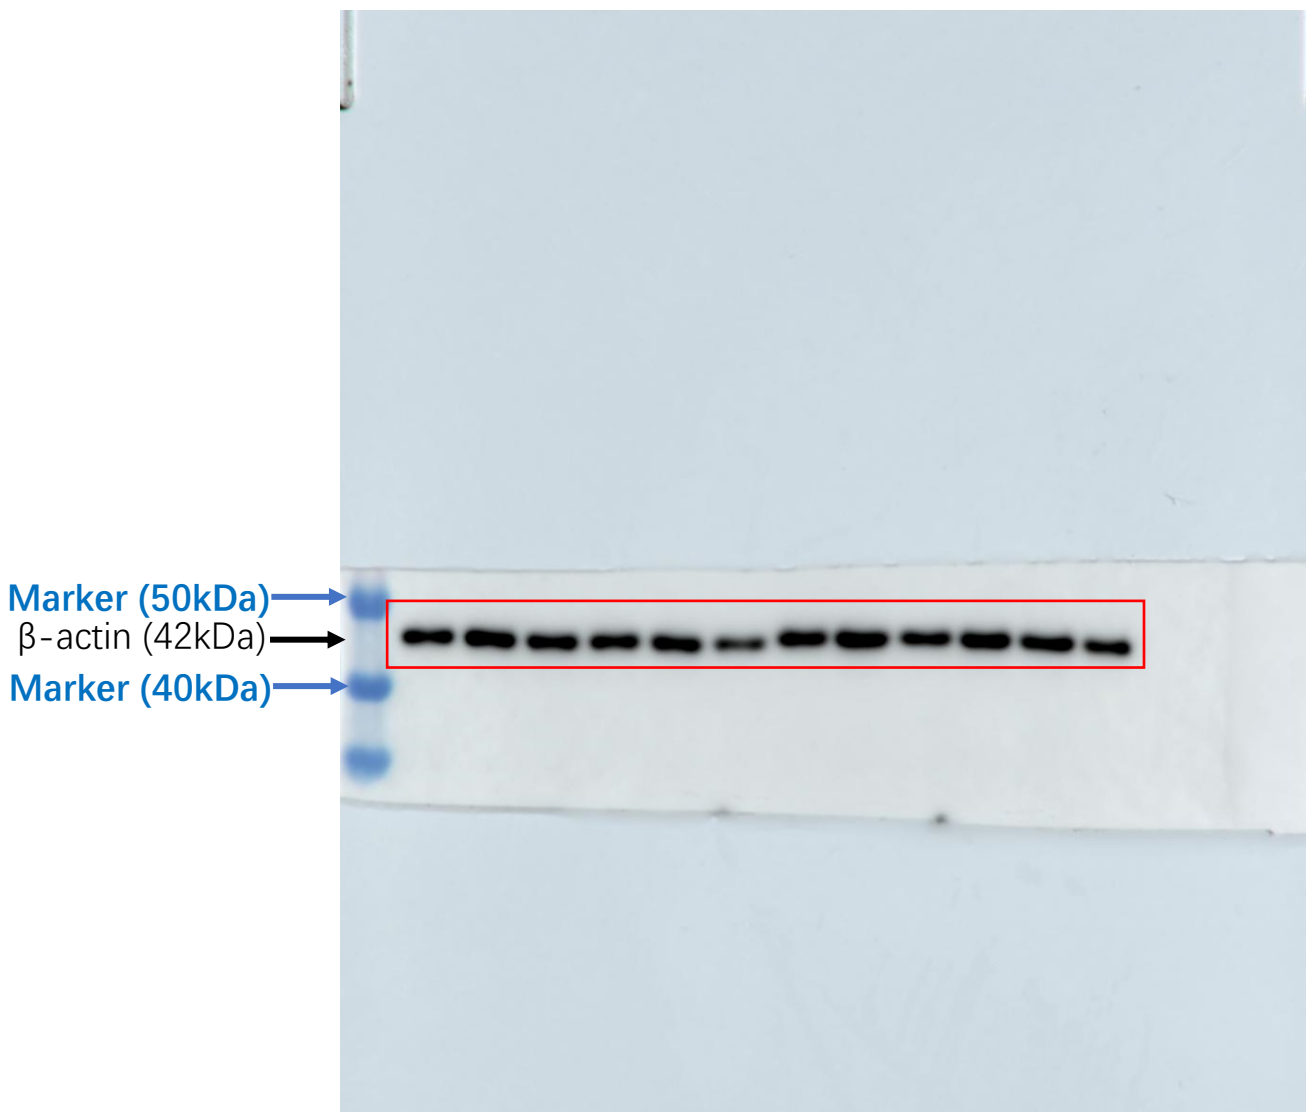

ACC and β-actin were from the same membrane.

SFig4 D

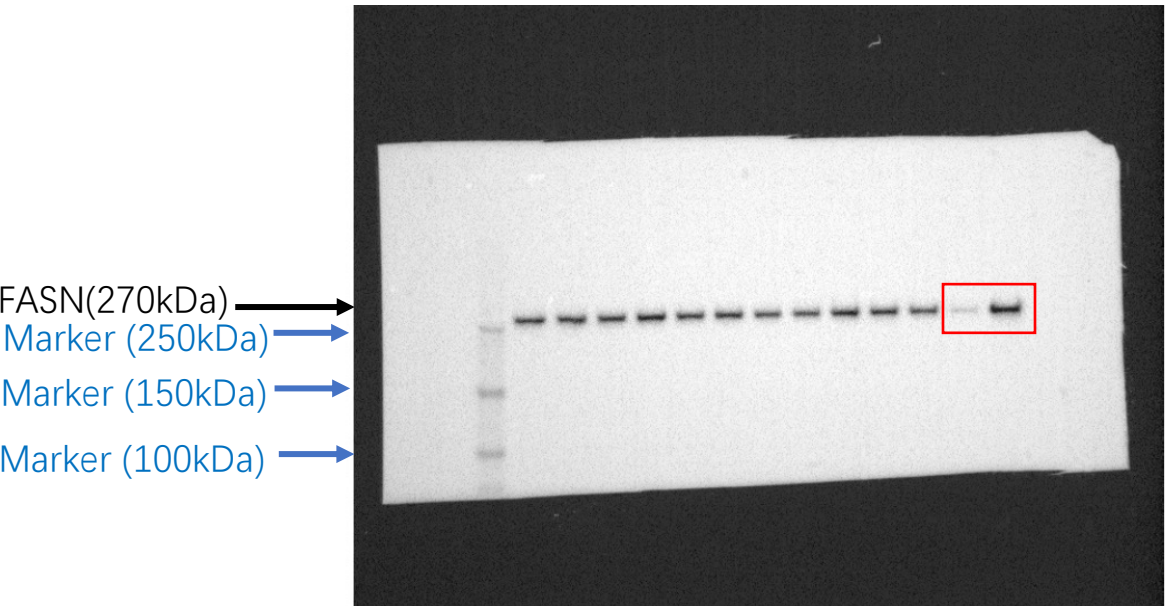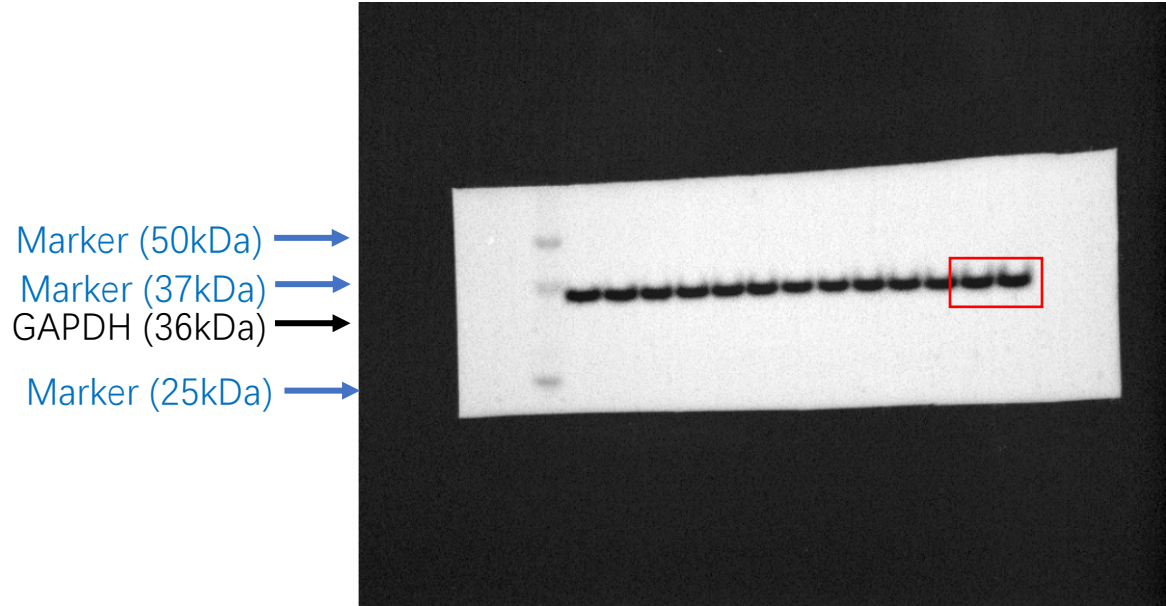

FASN and GAPDH were from the same membrane.

SFig4 F

p53

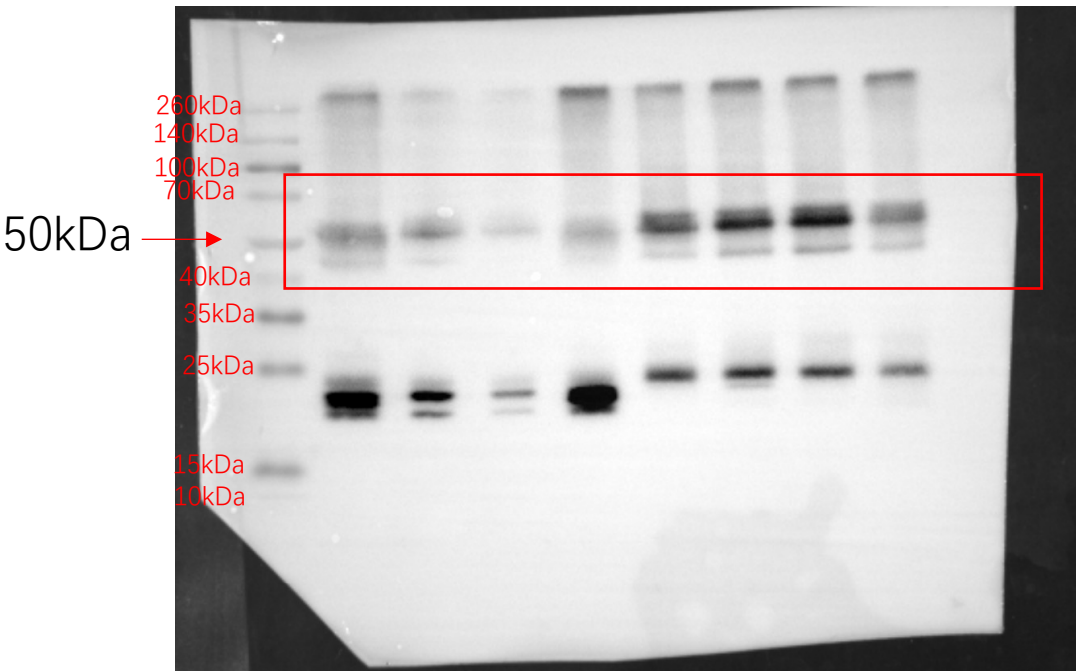

Pro-SFTPC

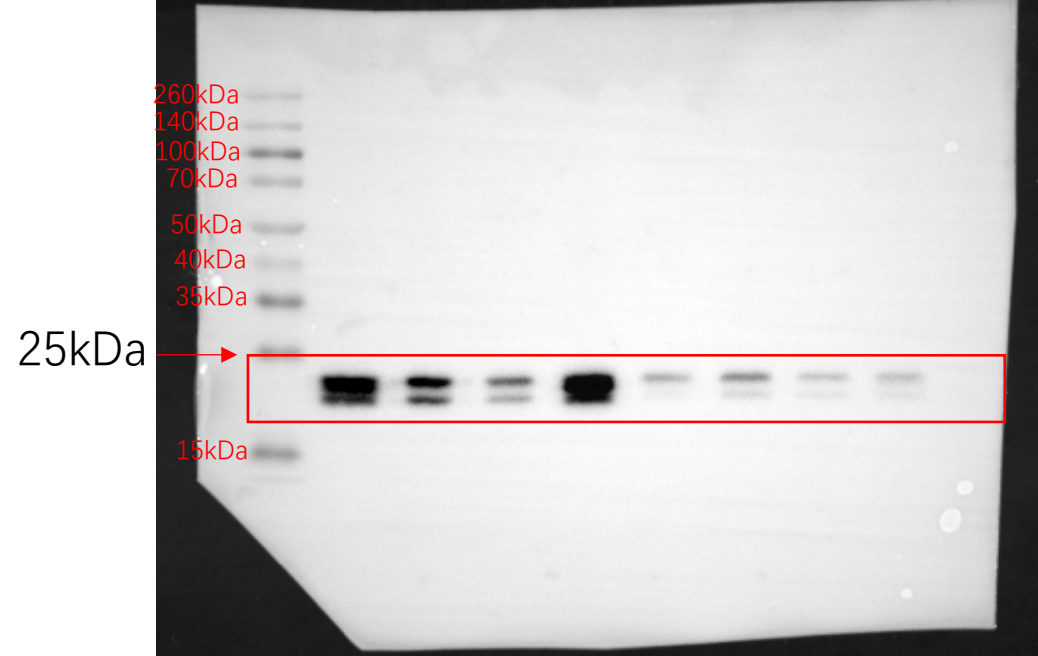

50kDa

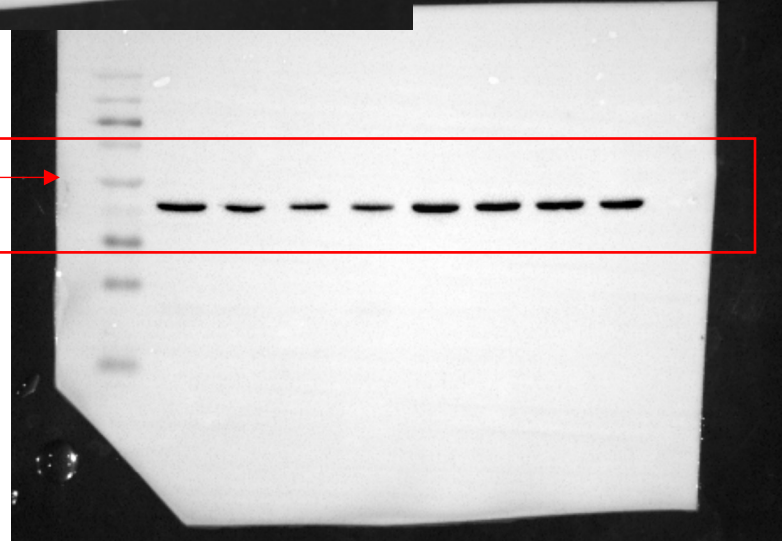

Actin
